# Supplementary material for: Tryptophan-PNA gc Conjugates Self-Assemble to Form Fibers
Source: PubMed Central journal article supplement (PMC10436247; doi:10.1021/acs.bioconjchem.3c00200), 2023-07-24
Supplement: bc3c00200_si_001.pdf [file bc3c00200_si_001.pdf]

## Supporting information for

### Tryptophan-PNA gc conjugates self-assemble to form fibers

Andrea Mosseri<sup>a</sup>, Maria Sancho-Albero<sup>b</sup>, Flavia Anna Mercurio<sup>c</sup>, Marilisa Leone<sup>c</sup>, Luisa De Cola<sup>a,b</sup>,  
Alessandra Romanelli<sup>a\*</sup>

<sup>a</sup> Dipartimento di Scienze Farmaceutiche, Università degli Studi di Milano, via Venezian 21, 20133 Milano, Italy.

<sup>b</sup> Department of Molecular Biochemistry and Pharmacology, Istituto di Ricerche Farmacologiche Mario Negri IRCCS, 20156, Milano, Italy.

<sup>c</sup> Istituto di Biostrutture e Bioimmagini – CNR, via Mezzocannone 16, 80134 Naples, Italy.

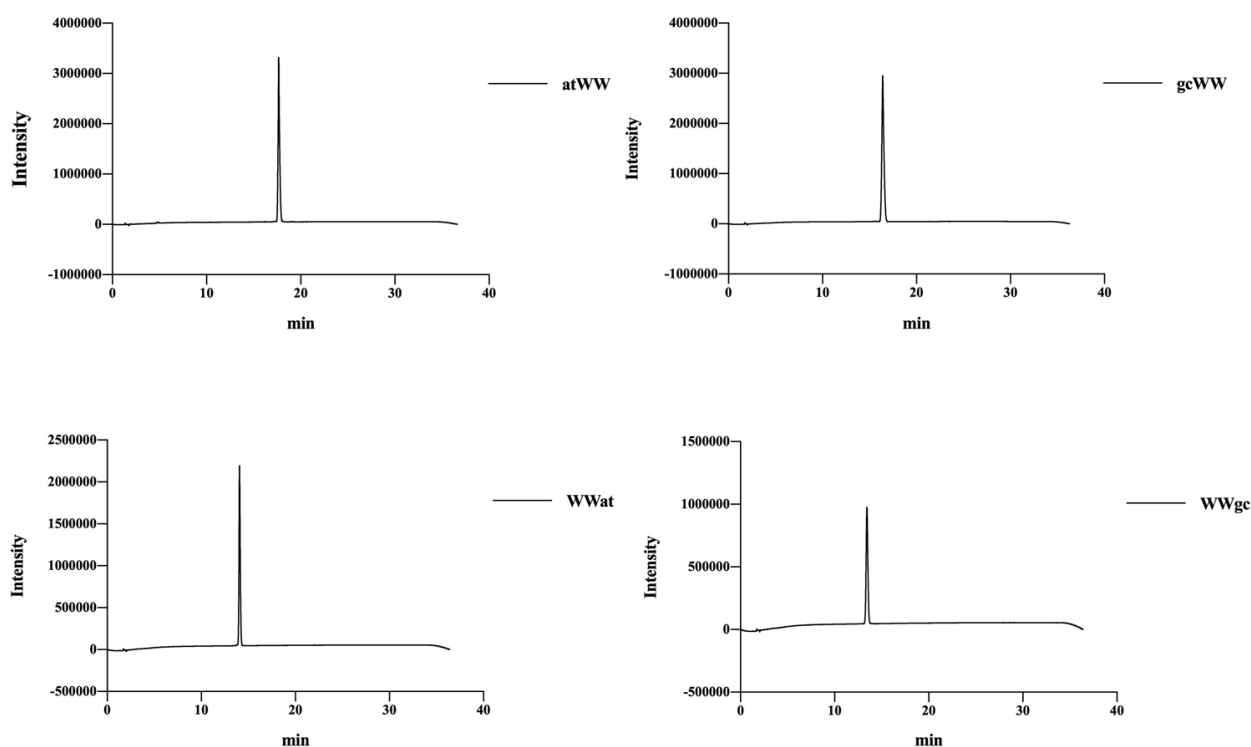

**Figure S1.** HPLC profiles of pure compounds. Column: Sepachrom Vydamas 5 $\mu$  C18 100 Å 150x4.6 mm; method: gradient of CH<sub>3</sub>CN (0.1% v/v TFA) in H<sub>2</sub>O (0.1% v/v TFA) from 10% to 50% in 30 minutes.

**Figure S2.** MALDI-TOF spectra of PNA-peptide conjugates

gcWW

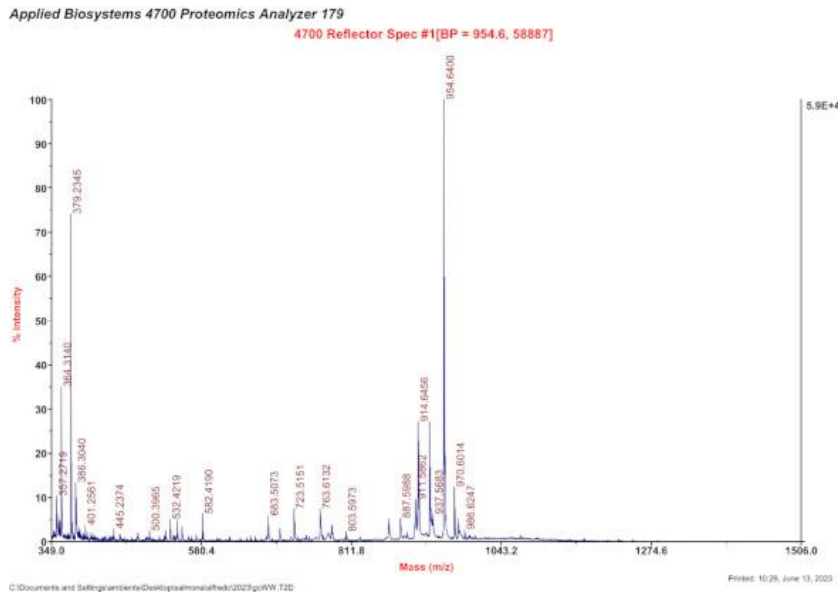

atWW

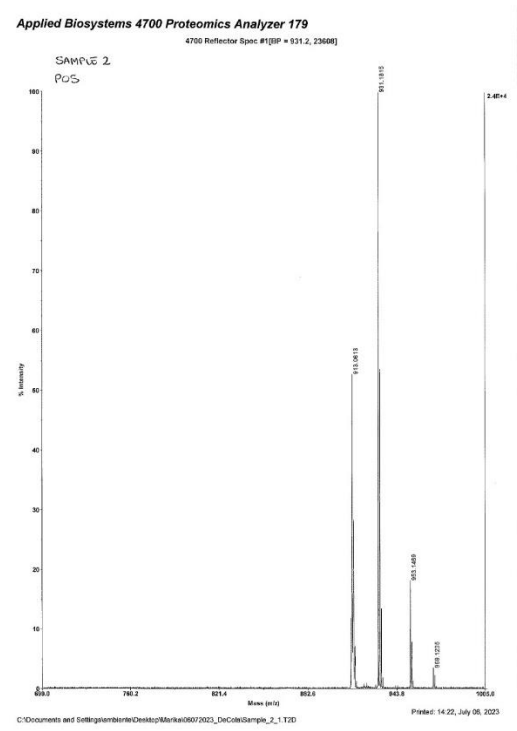



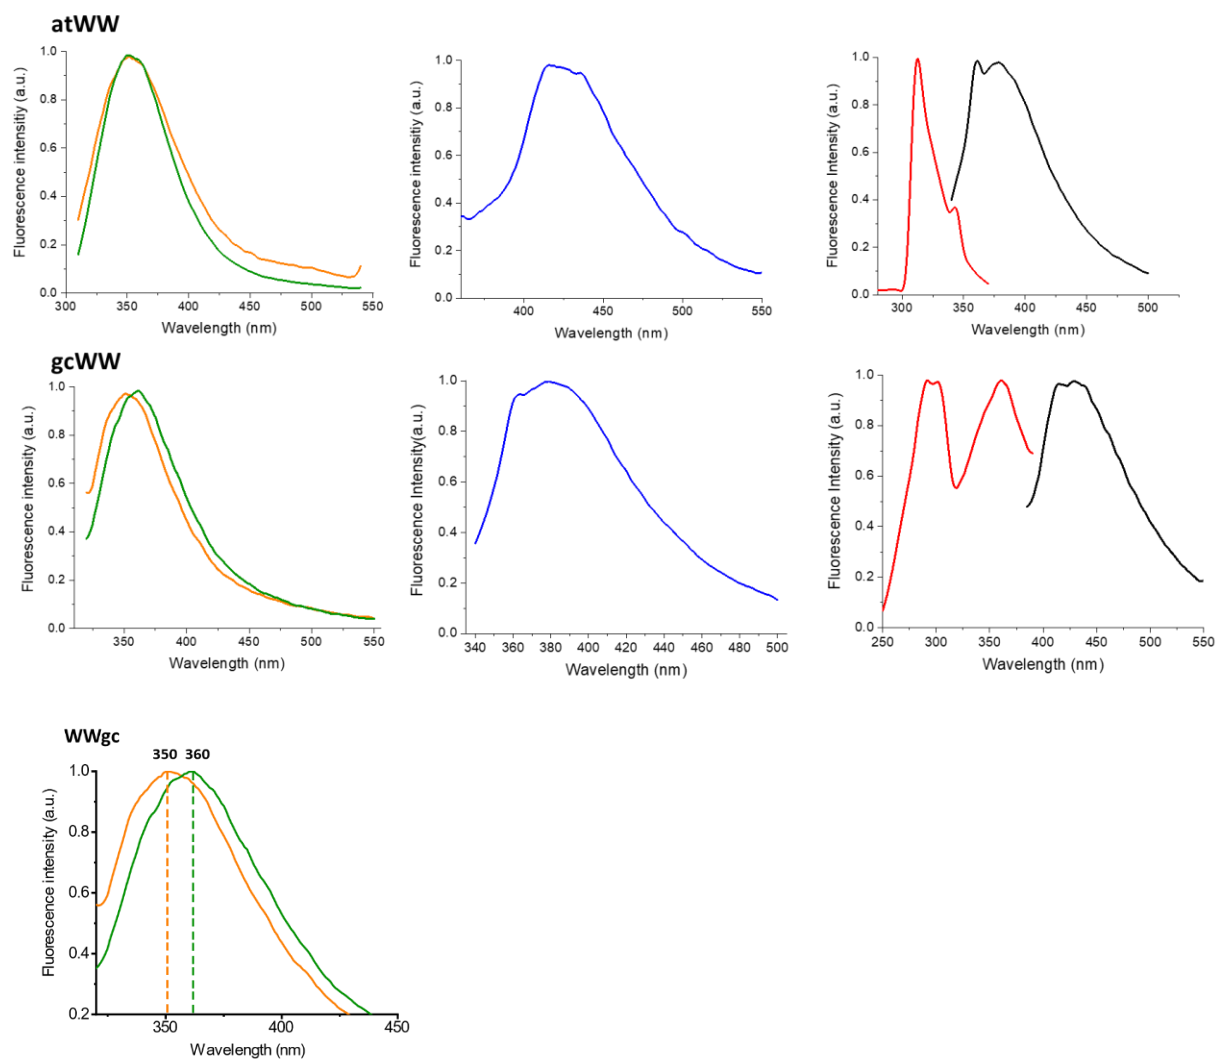

**Figure S3.** Fluorescence spectra of atWW and gcWW in water (top and middle). From left to right: emission spectrum  $\lambda_{\text{ex}}$ : 280 nm (green line: 10 mg/mL; orange line: 1 mg/mL), emission spectrum  $\lambda_{\text{ex}}$ : 330 nm (blue line) at 10 mg/mL, excitation (red line) and emission (black line) spectra with  $\lambda_{\text{ex}}$ : 360 nm and  $\lambda_{\text{em}}$ : 450 nm at 10 mg/mL. The bottom panel is a zoom of the emission spectra of WWgc reported in Figure 3, highlighting the 10 nm shift in the emission spectrum at increasing concentration.

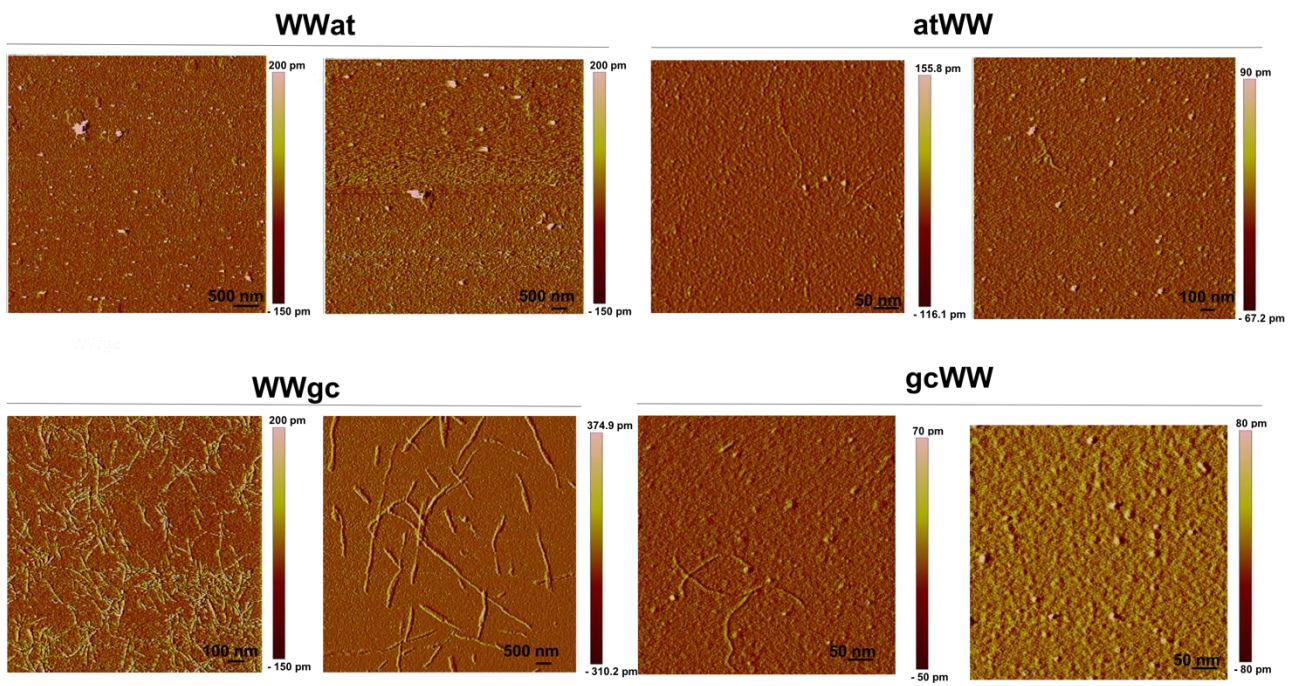

**Figure S4.** Tapping mode AFM analysis of WWat, atWW, WWgc, gcWW aggregates in water (10 mg/mL).

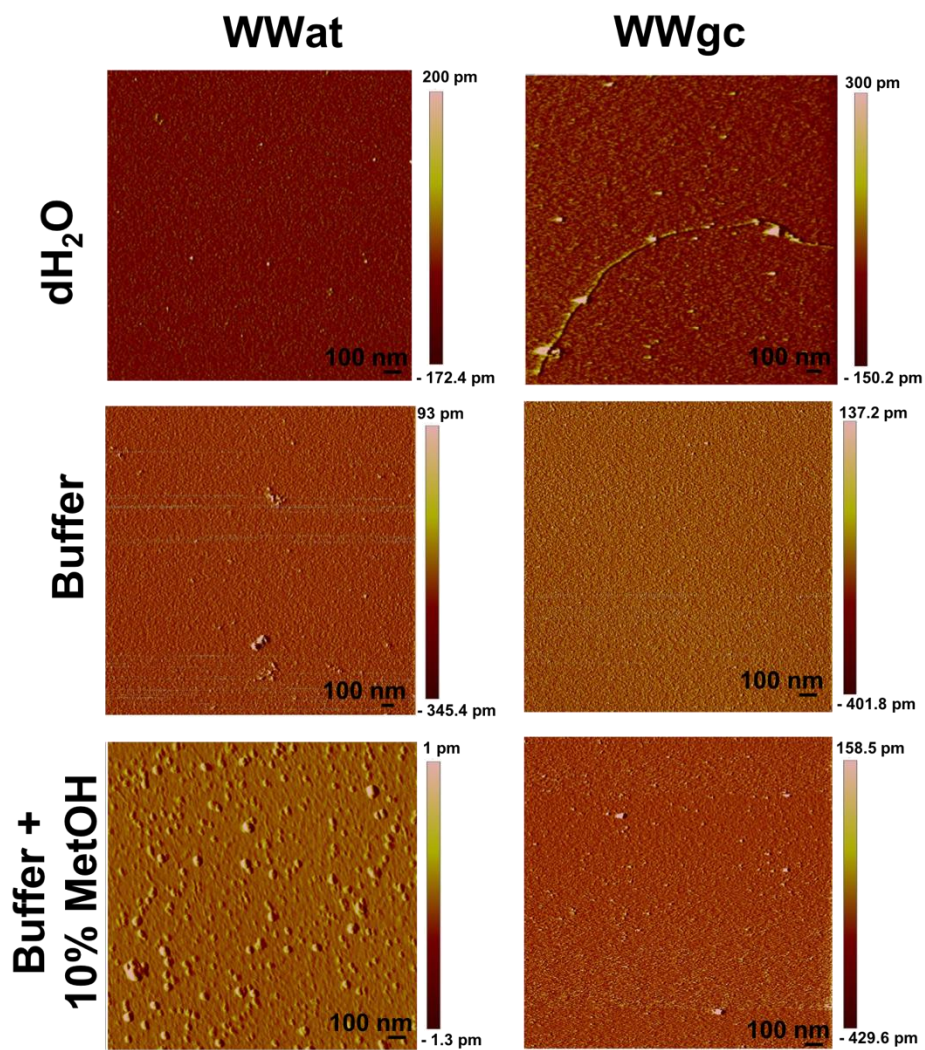

**Figure S5.** Tapping mode AFM analysis of WWat, and, WWgc aggregates at 4 mg/mL in water, buffer (pH 5.5) and buffer (pH 5.5) with MeOH 10 %.



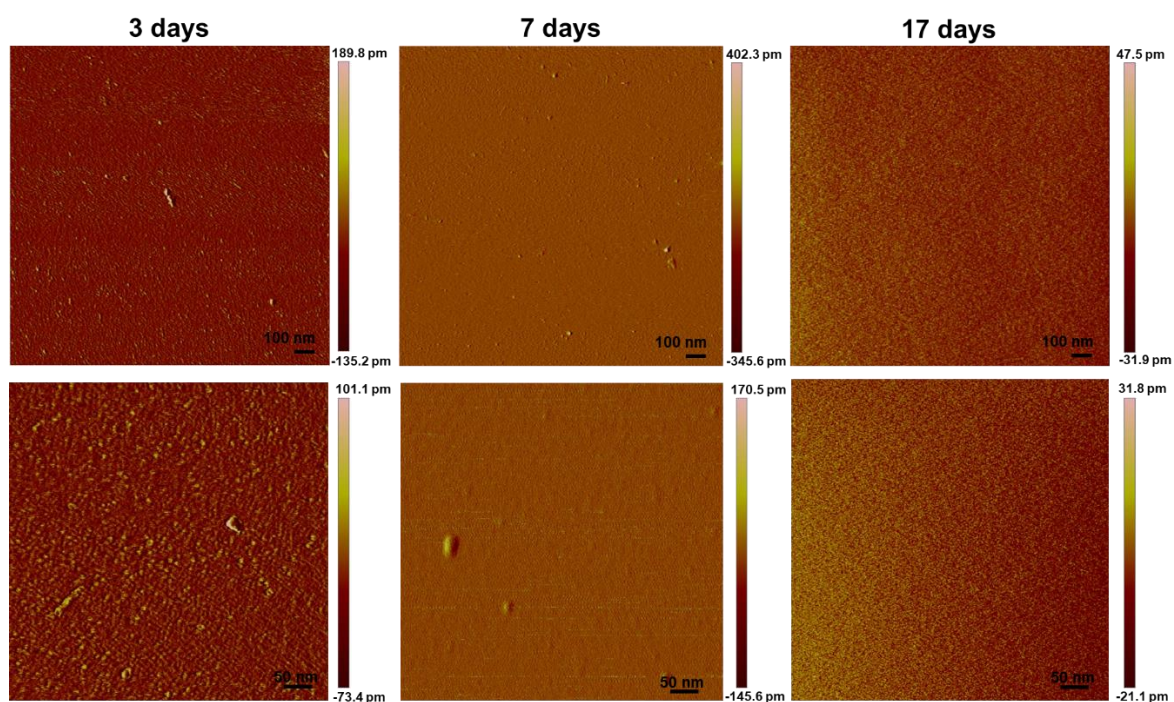

**Figure S6.** Tapping mode AFM analysis of WWgc aggregates at 4 mg/mL incubated in water for different times.

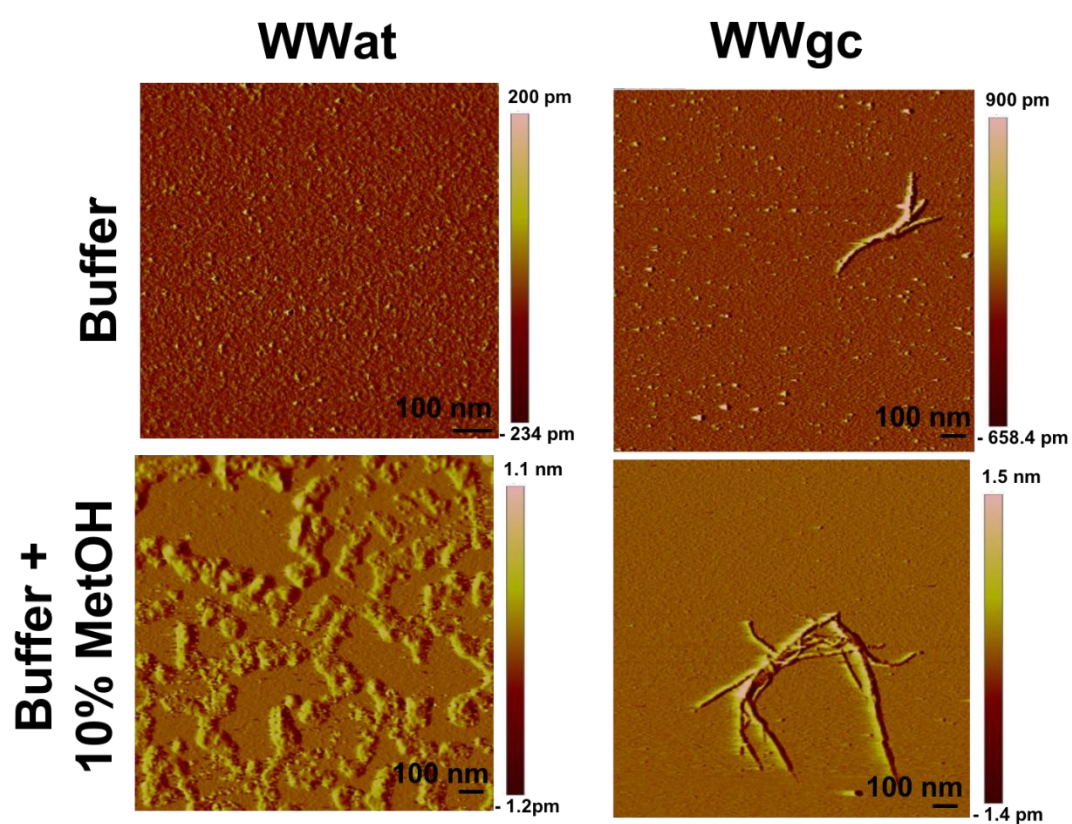

**Figure S7.** Tapping mode AFM analysis of WWat, and, WWgc aggregates at 10 mg/mL in buffer and buffer with MeOH 10 %.

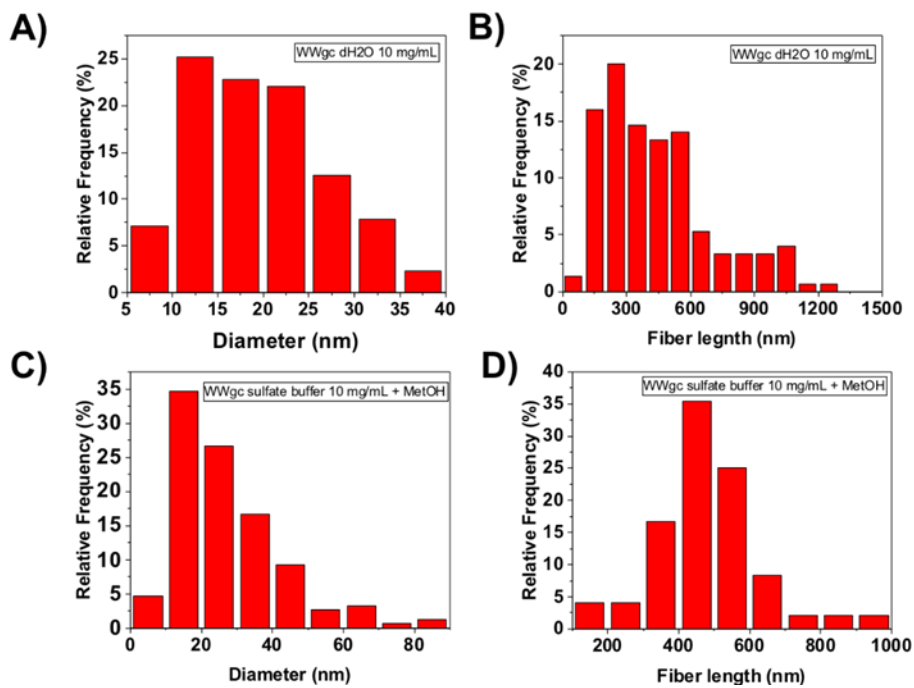

**Figure S8.** Diameter and fiber length analysis of WWgc samples when they were dissolved in water or in buffer with 10 % methanol.



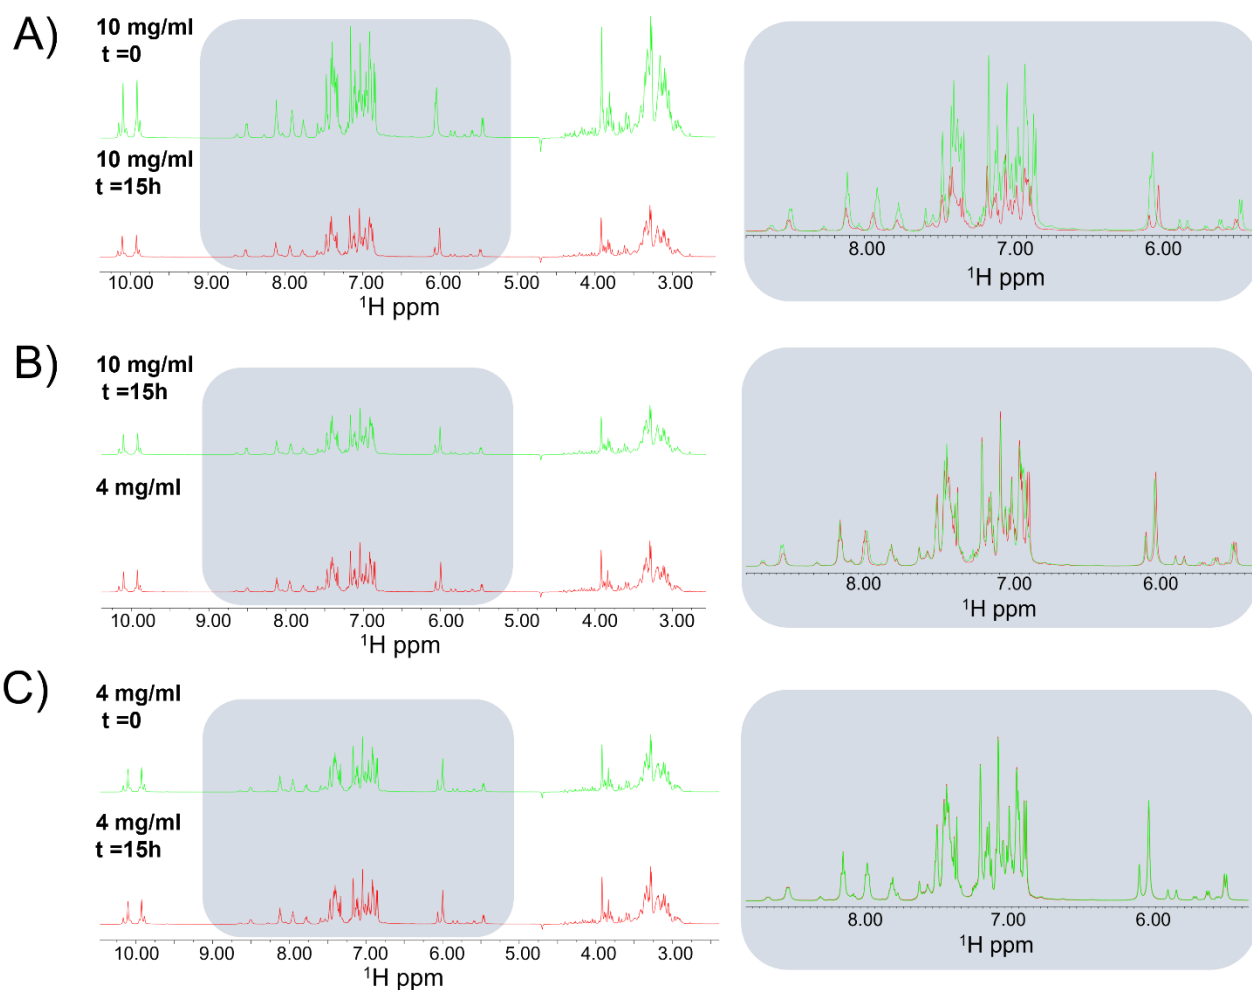

**Figure S9.** Comparison of 1D  $^1\text{H}$  NMR spectra of (A) WWgc (10 mg/mL) at different incubation times, (B) of WWgc (10 mg/mL) after 15h incubation and WWgc (4 mg/mL) and (C) of WWgc (4 mg/mL) at different incubation times. The spectral regions evidenced by light blue rectangles in each panel are shown as superpositions in the right inserts.

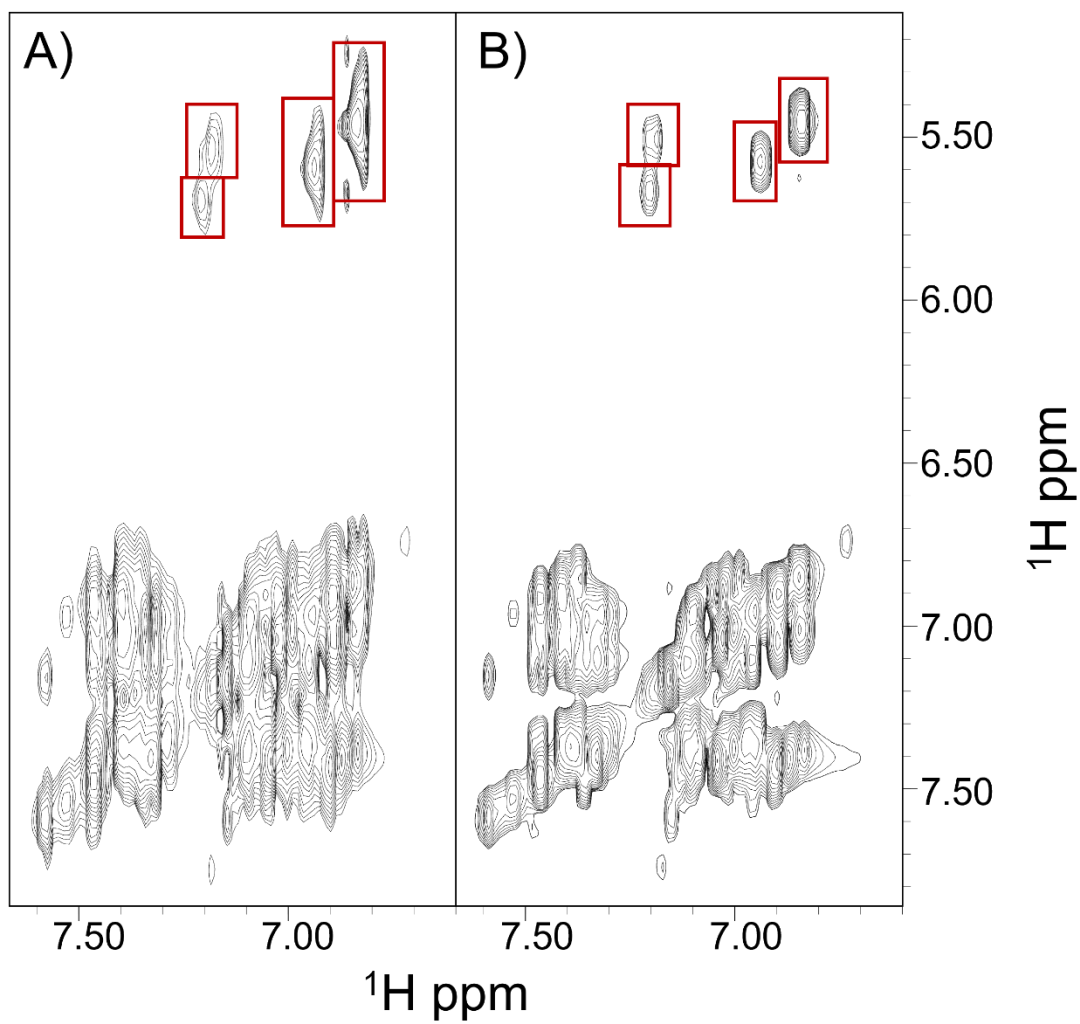

**Figure S10.** 2D [ $^1\text{H}$ - $^1\text{H}$ ] TOCSY spectra of WWgc at concentrations equal to 10 mg/mL (A) and 4 mg/mL (B). Correlations in between aromatic H5 and H6 cytosine protons in the four rotamers are highlighted with red boxes.

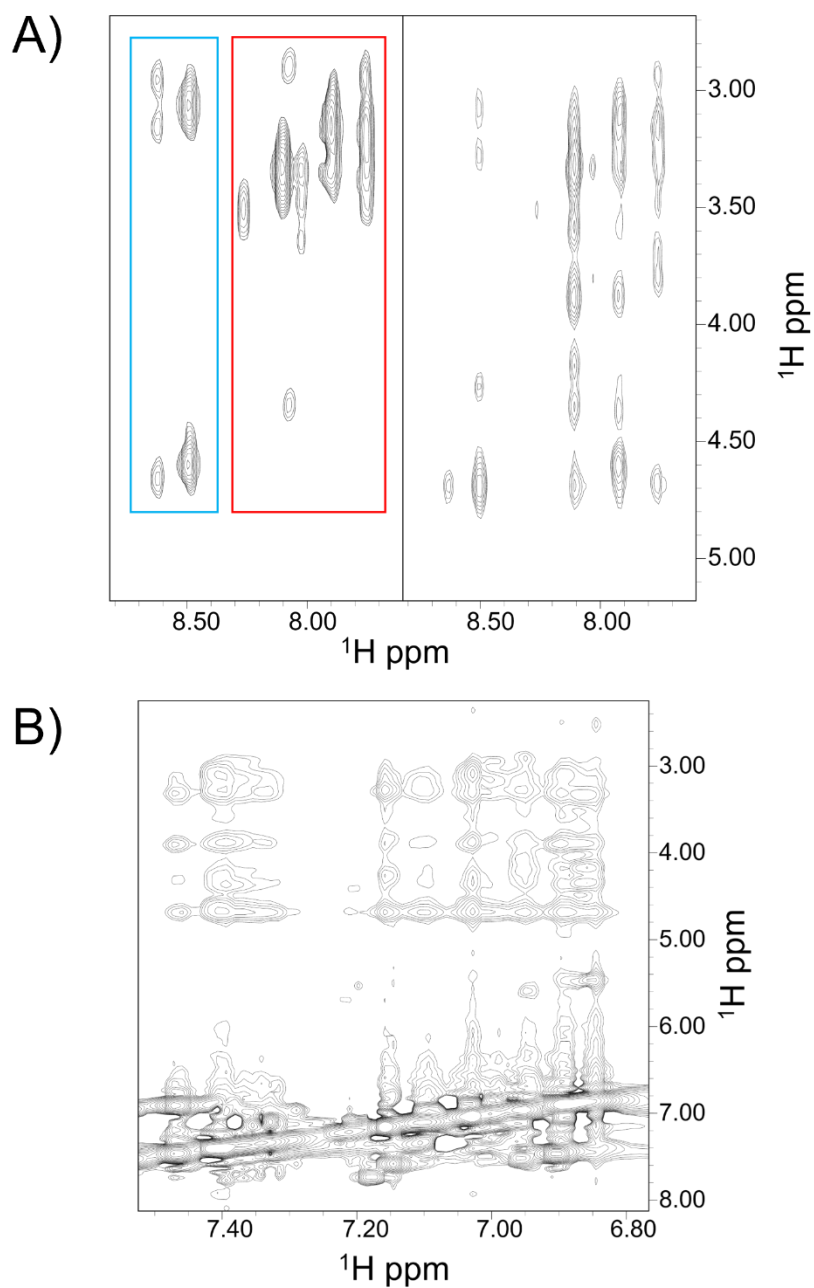

**Figure S11.** (A) Comparison of HN-high field correlation regions of TOCSY (left) and NOESY (right) spectra of WWgc (10 mg/mL). Blue and red rectangles in the TOCSY spectrum indicate Tryptophans and PNA residues spin systems, respectively. (B) Aromatic region of the NOESY spectrum of WWgc (10 mg/mL).

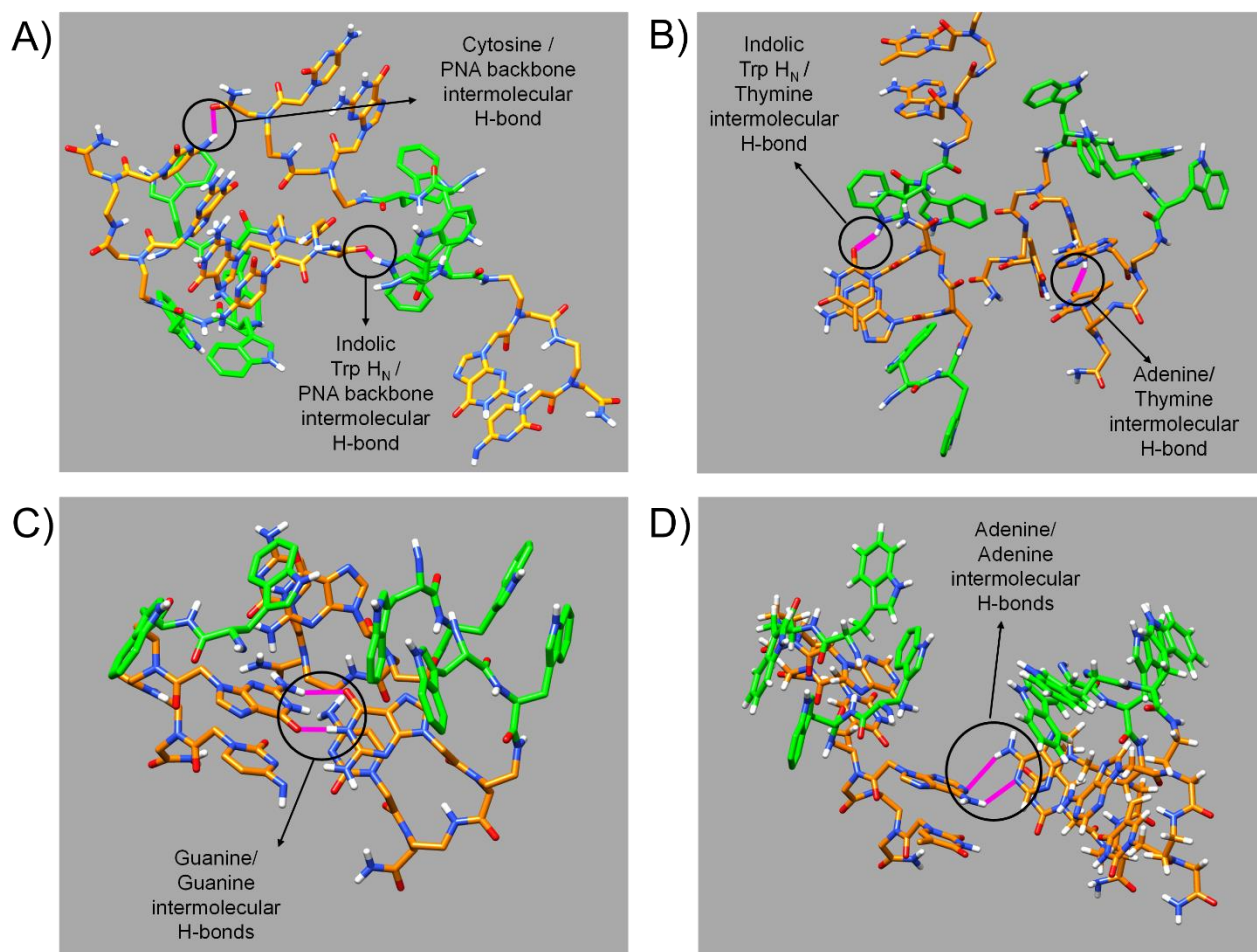

**Figure S12.** Details of WWgc and WWat sphere-like models reported in figure 7A-D of the main text in which different types of intermolecular H-bonds are highlighted. More precisely, panel (A) is related to the WWgc inhomogeneous sphere-like model shown in figure 7A; panel (B) is related to WWat inhomogeneous sphere-like model shown in figure 7B; panel (C) is related to WWgc circular sphere-like model shown in figure 7C; panel (D) is related to WWat circular sphere-like model shown in figure 7D. In the diverse panels only a few units composing the whole models reported in Figure 7A-D are shown to better visualize H-bonds. Trp and PNA residues are colored in green and orange, respectively, and H-bonds are displayed in magenta.
